# Supplementary material for: Surface effects on the structure and mobility of the ionic liquid C6C1ImTFSI in silica gels
Source: Royal Society of Chemistry journal article supplement (doi:10.1039/c4sm00642a), 2014-01-01
Supplement: c4sm00642a1.pdf [file c4sm00642a1.pdf]

## Electronic Supplementary Information 1:

### Surface effects on the structure and mobility of the ionic liquid $C_6C_1ImTFSI$ in silica gels

Moheb Nayeri,<sup>‡a</sup> Matthew T. Aronson,<sup>b</sup> Diana Bernin,<sup>c</sup> Bradley F. Chmelka,<sup>b</sup> and Anna Martinelli<sup>‡a</sup>

#### Estimating volume fraction silica

The volume fraction of silica,  $\phi$ , was estimated using the mole mass of  $SiO_2$  and the ionic liquid together with the densities  $\rho_{SiO_2} = 2.2 \text{ g/cm}^3$  and  $\rho_{IL} = 1.37 \text{ g/cm}^3$  which allows us to calculate the molar volumes  $V_{SiO_2}$  and  $V_{IL}$ . These values in turn give that the silica volume fraction in the ionogel is:

$$\phi_{SiO_2}(x) = \frac{V_{SiO_2}}{V_{SiO_2} + V_{IL}x}.$$

---

<sup>a</sup> Applied Surface Chemistry, Chemical and Biological Engineering, Chalmers University of Technology, Gothenburg, Sweden.

<sup>b</sup> Department of Chemical Engineering, University of California, Santa Barbara, California 93106 USA.

<sup>c</sup> Swedish NMR Centre, University of Gothenburg, Gothenburg, Sweden.

‡ Email: moheb.nayeri@chalmers.se, anna.martinelli@chalmers.se
