# Supplementary material for: Surface effects on the structure and mobility of the ionic liquid C6C1ImTFSI in silica gels
Source: Royal Society of Chemistry journal article supplement (doi:10.1039/c4sm00642a), 2014-01-01
Supplement: c4sm00642a4.pdf [file c4sm00642a4.pdf]

## Electronic Supplementary Information 4:

### Surface effects on the structure and mobility of the ionic liquid $C_6C_1ImTFSI$ in silica gels

Moheb Nayeri,<sup>‡a</sup> Matthew T. Aronson,<sup>b</sup> Diana Bernin,<sup>c</sup> Bradley F. Chmelka,<sup>b</sup> and Anna Martinelli<sup>‡a</sup>

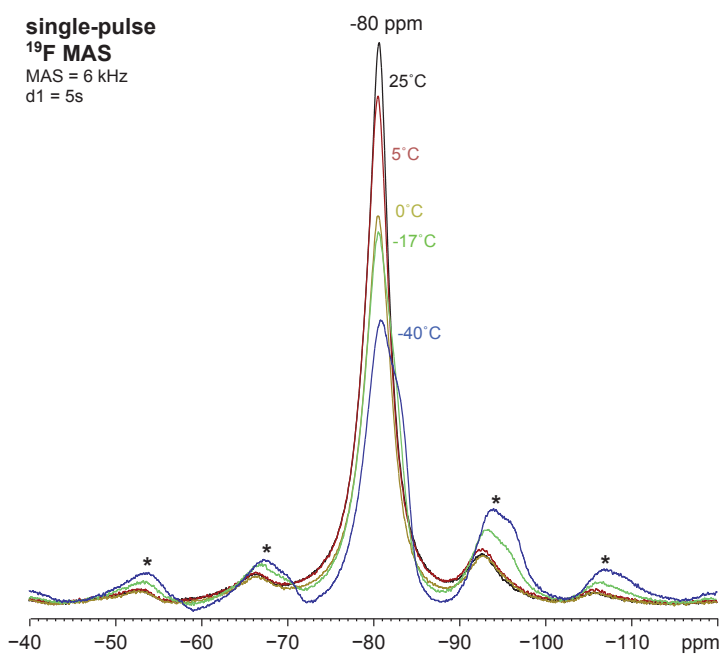

**Fig. 1** Solid-state 1D single-pulse  $^{19}F$  NMR experiments conducted at room temperature on the dehydrated ionogel sample.

<sup>a</sup> Applied Surface Chemistry, Chemical and Biological Engineering, Chalmers University of Technology, Gothenburg, Sweden.

<sup>b</sup> Department of Chemical Engineering, University of California, Santa Barbara, California 93106 USA.

<sup>c</sup> Swedish NMR Centre, University of Gothenburg, Gothenburg, Sweden.

‡ Email: moheb.nayeri@chalmers.se, anna.martinelli@chalmers.se
